# Supplementary material for: Stimuli responsive nanocarrier for an effective delivery of multi-frontline tuberculosis drugs
Source: Royal Society of Chemistry journal article supplement (doi:10.1039/c3py01589k), 2013-12-02
Supplement: c3py01589k.pdf [file c3py01589k.pdf]

# **Stimuli responsive nanocarrier for an effective delivery of multi-frontline tuberculosis drugs**

Shivshankar R. Mane<sup>1</sup>, Koushik Chatterjee<sup>1</sup>, Himadri Dinda<sup>1</sup>, Jayasri Das Sarma<sup>2\*</sup>, and Raja Shunmugam<sup>1\*</sup>

<sup>1</sup>Polymer Research Centre, Department of Chemical Sciences, and <sup>2</sup>Department of Biological Sciences, Indian Institute of Science Education and Research Kolkata (IISER K), India.

E-mail: [sraja@iiserkol.ac.in](mailto:sraja@iiserkol.ac.in).

## Index

| Fig. | Title                                                               | Page No. |
|------|---------------------------------------------------------------------|----------|
|      | Synthesis Scheme S1-S3                                              | 4        |
| S1   | <sup>1</sup> H NMR spectrum of <b>Mono 1</b>                        | 5        |
| S2   | <sup>13</sup> C NMR spectrum of <b>Mono 1</b>                       | 6        |
| S3   | MALDI –TOF spectrum of <b>Mono 1</b>                                | 6        |
| S4   | FT-IR spectra of Rifampicin and <b>Mono 1</b>                       | 7        |
| S5   | <sup>1</sup> H NMR spectrum of <b>Compound 5</b>                    | 7        |
| S6   | <sup>13</sup> C NMR spectrum of <b>Compound 5</b>                   | 8        |
| S7   | <sup>1</sup> H NMR spectrum of <b>Mono 3</b>                        | 8        |
| S8   | <sup>13</sup> C NMR spectrum of <b>Mono 3</b>                       | 9        |
| S9   | FT-IR spectra of compound <b>5</b> and <b>Mono 3</b>                | 9        |
| S10  | <sup>1</sup> H NMR spectrum of <b>RIF-HP 4</b>                      | 10       |
| S11  | GPC for <b>PEG HP1</b>                                              | 10       |
| S12  | GPC for <b>BCP-1</b>                                                | 11       |
| S13  | GPC for <b>RCP-1</b>                                                | 11       |
| S14  | <sup>1</sup> H NMR for <b>RCP-2</b> and CAC of <b>RCP-2</b>         | 12       |
| S15  | UV spectra of <b>RCP-2</b>                                          | 13       |
| S16  | Fluorescence spectra of <b>RCP-2</b>                                | 13       |
| S17  | UV spectra for drug release from <b>RCP-2</b> at pH 5.5             | 14       |
| S18  | UV spectra for drug release from <b>RCP-2</b> at pH 6.5             | 14       |
| S19  | <sup>1</sup> H NMR to demonstrate acid sensitivity of <b>Mono 3</b> | 15       |

|     |                                                                                           |    |
|-----|-------------------------------------------------------------------------------------------|----|
| S20 | Cytotoxicity assay of Isoniazid                                                           | 16 |
| S21 | Cytotoxicity assay of Rifampicin                                                          | 16 |
| S22 | Cytotoxicity assay of Norbornene polymer alone tested in HEK 293 cell line                | 17 |
| S23 | Cytotoxicity assay of the nanocarrier tested in normal healthy cells( HEK 293 cell line). | 17 |
| S24 | UV spectra of Rifampicin in different solutions                                           | 18 |
| S25 | Decomposition scheme for RIF                                                              | 19 |
| S26 | Control experiment to prove the delivery of undecomposed RIF drug.                        | 20 |

Scheme S1. Schematic representation of block copolymer, BCP-1 synthesis.

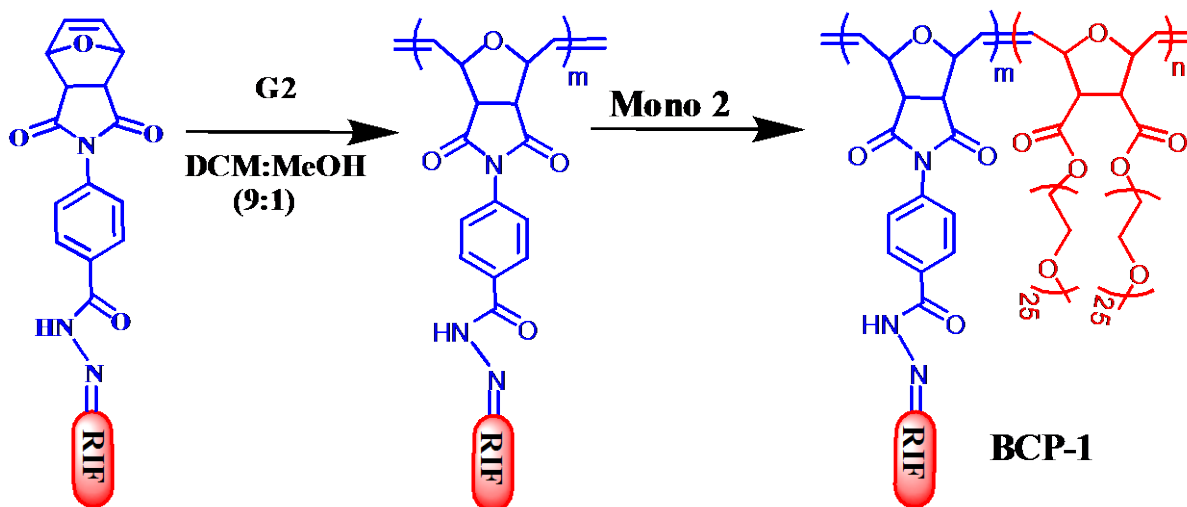

Scheme S2. Schematic representation of synthesis of random copolymer RCP-1.

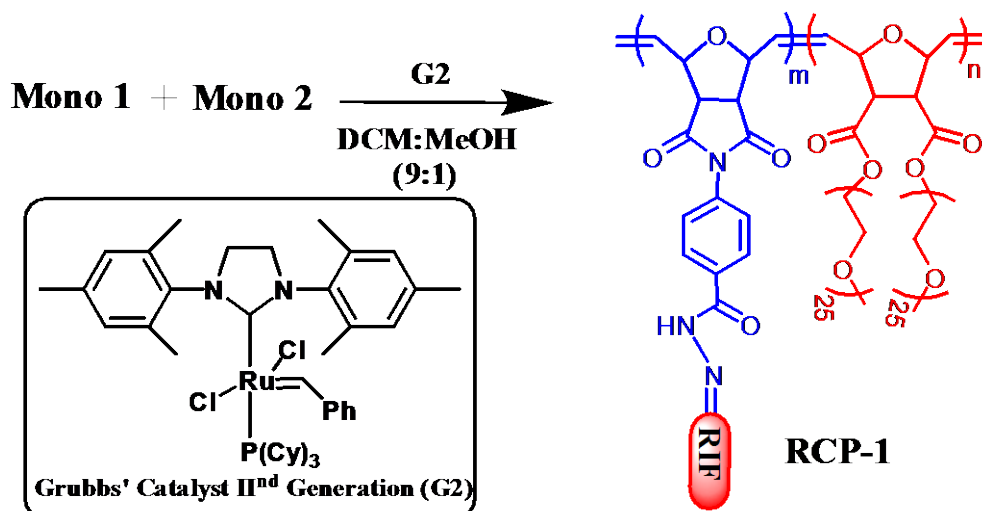

Scheme S3. Schematic representation of synthesis of random copolymer RCP-2 (NOR-INZ-RIF-PEG).

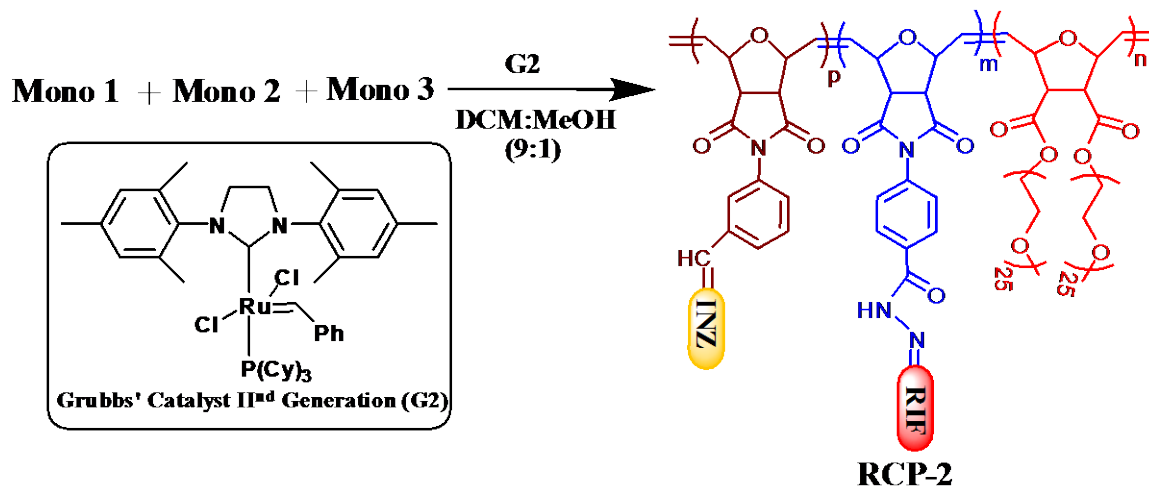

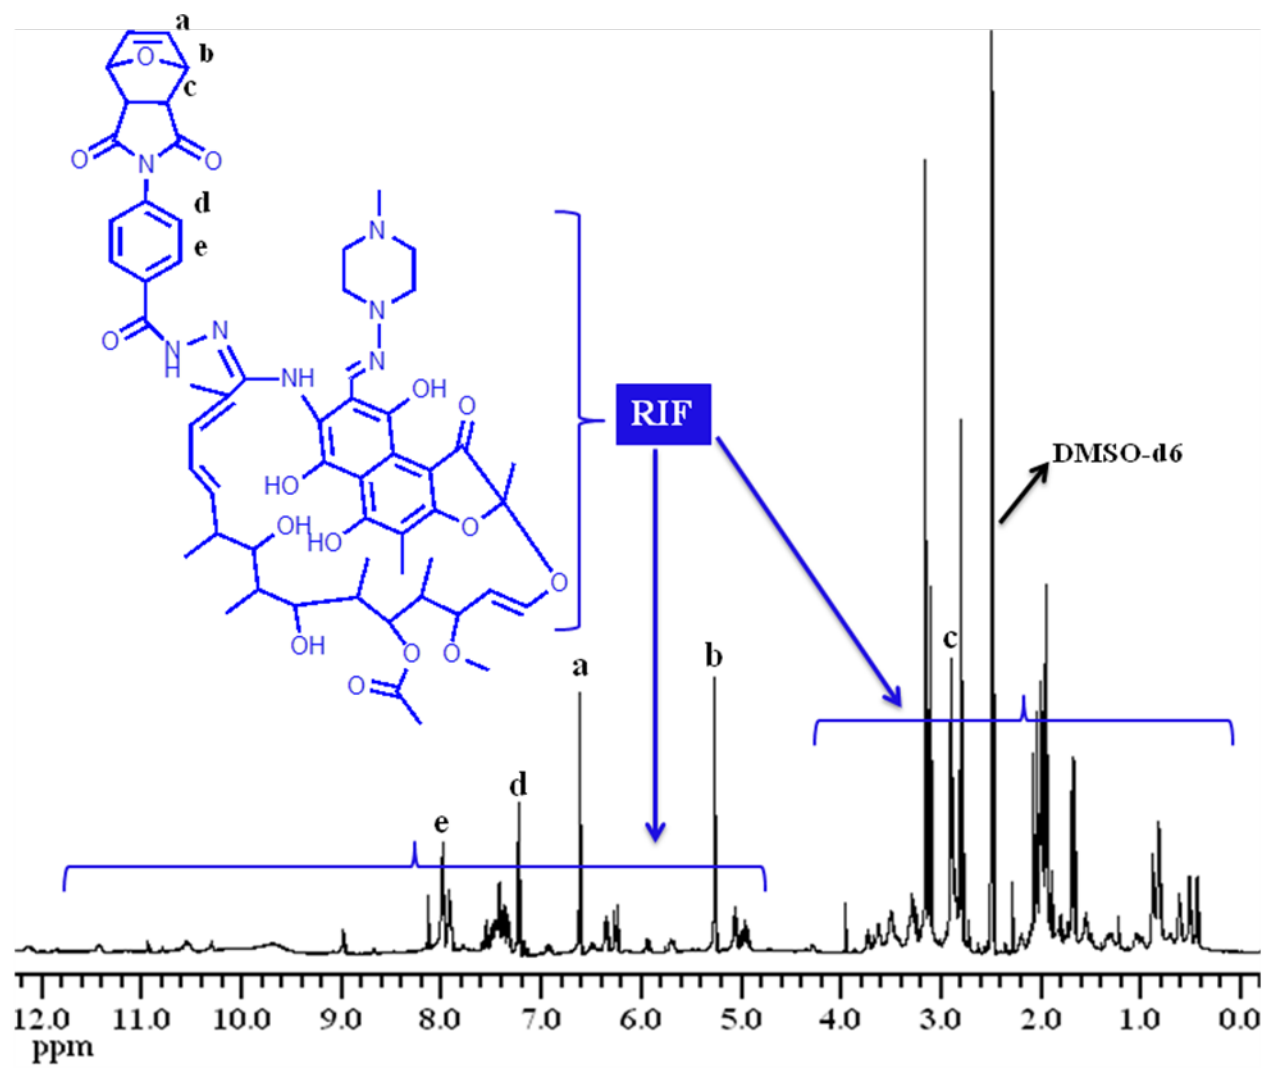

Fig. S1:  $^1\text{H}$  NMR spectrum of Mono 1 in  $\text{DMSO-d}_6$ .

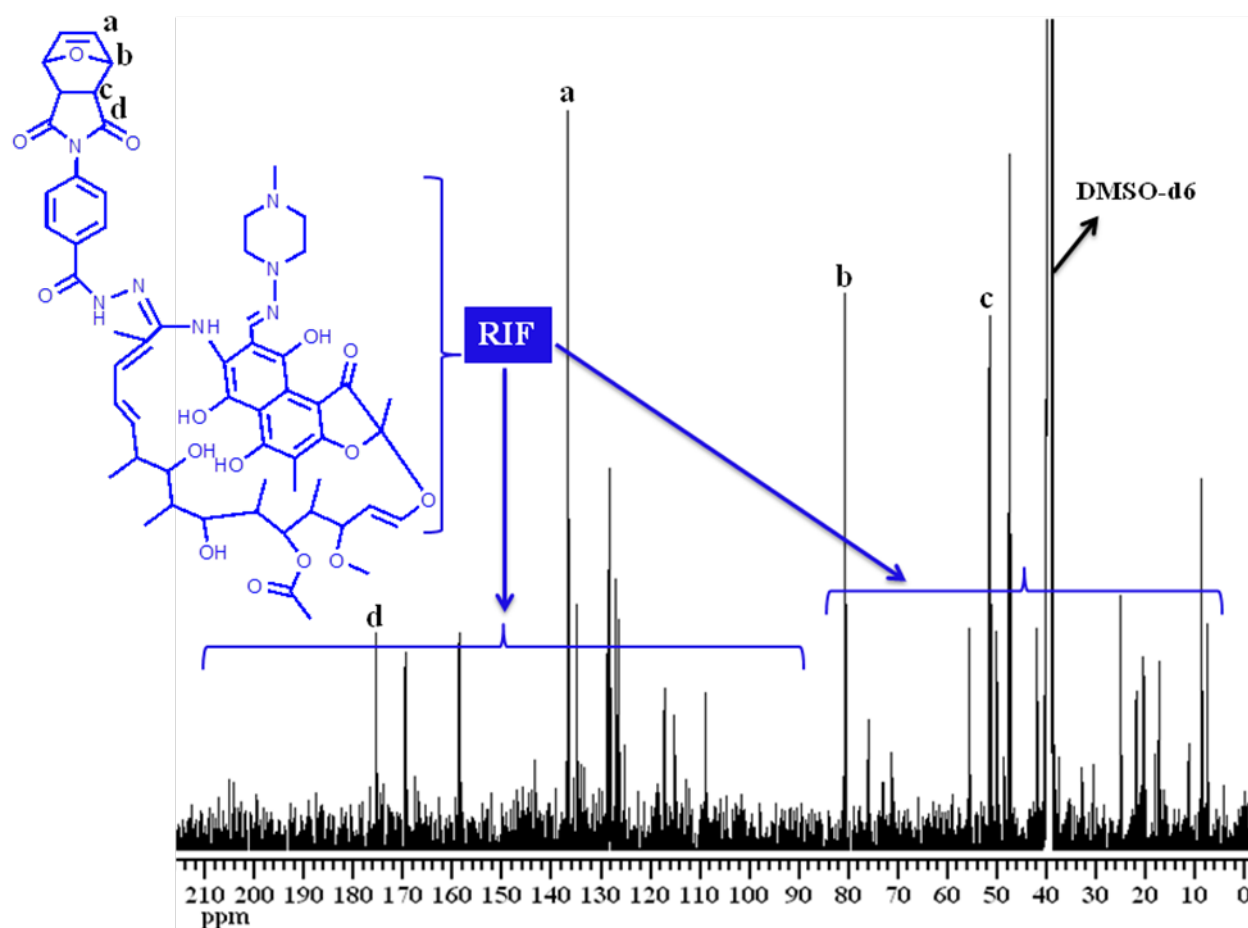

Fig. S2:  $^{13}\text{C}$  NMR spectrum of Mono 1 in  $\text{DMSO-d}_6$ .

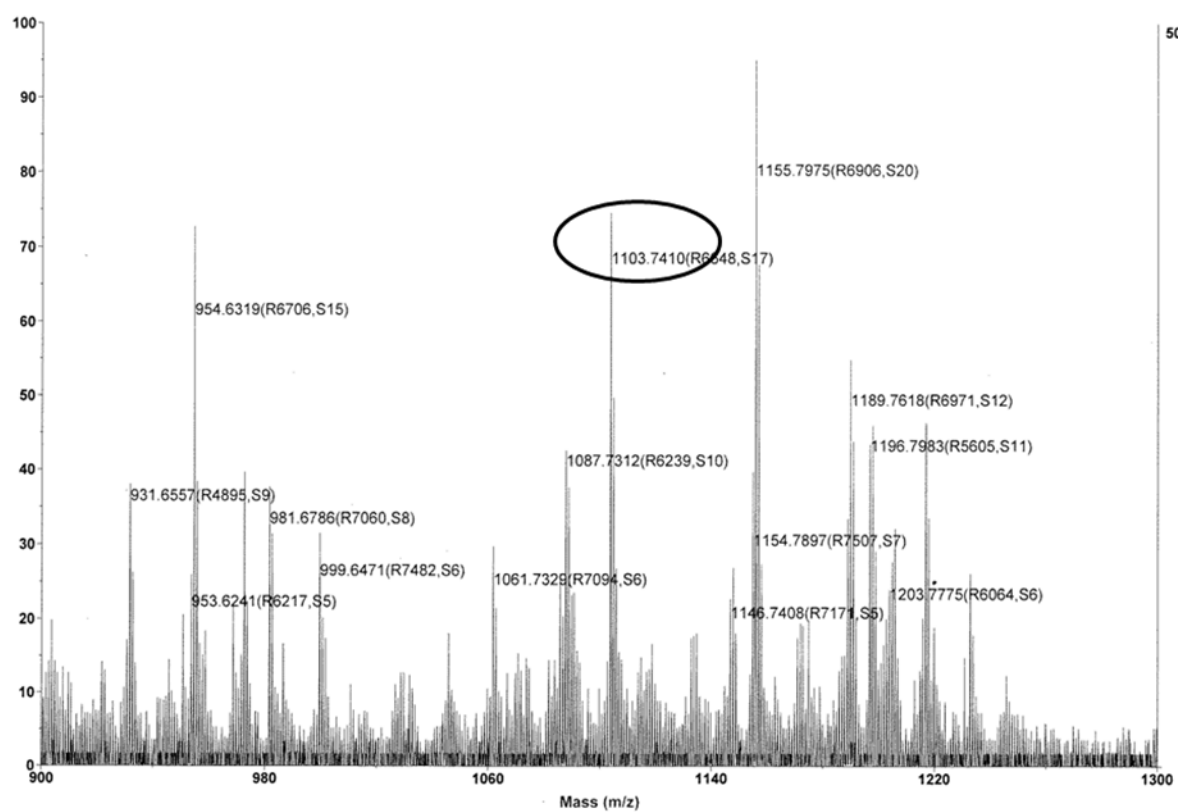

Fig. S3: MALDI-TOF spectrum of Mono 1.

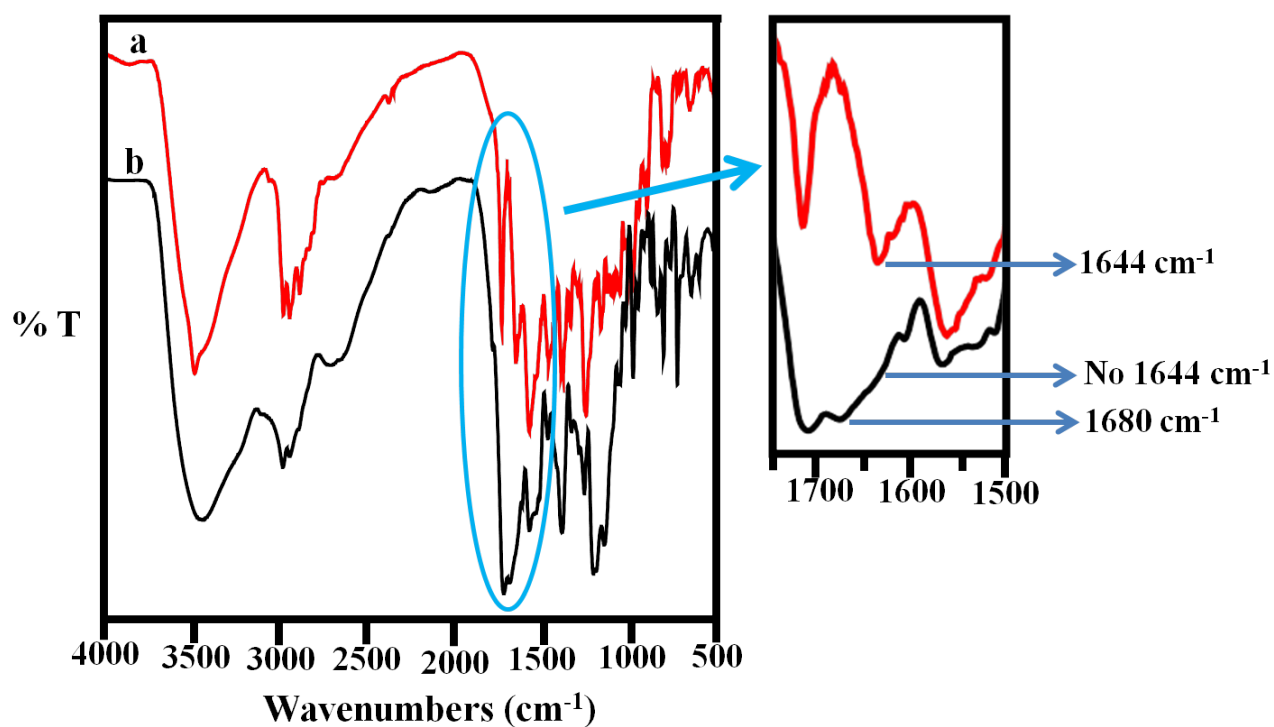

**Fig. S4:** FT-IR spectrum of (a) Rifampicin and (b) Mono 1.

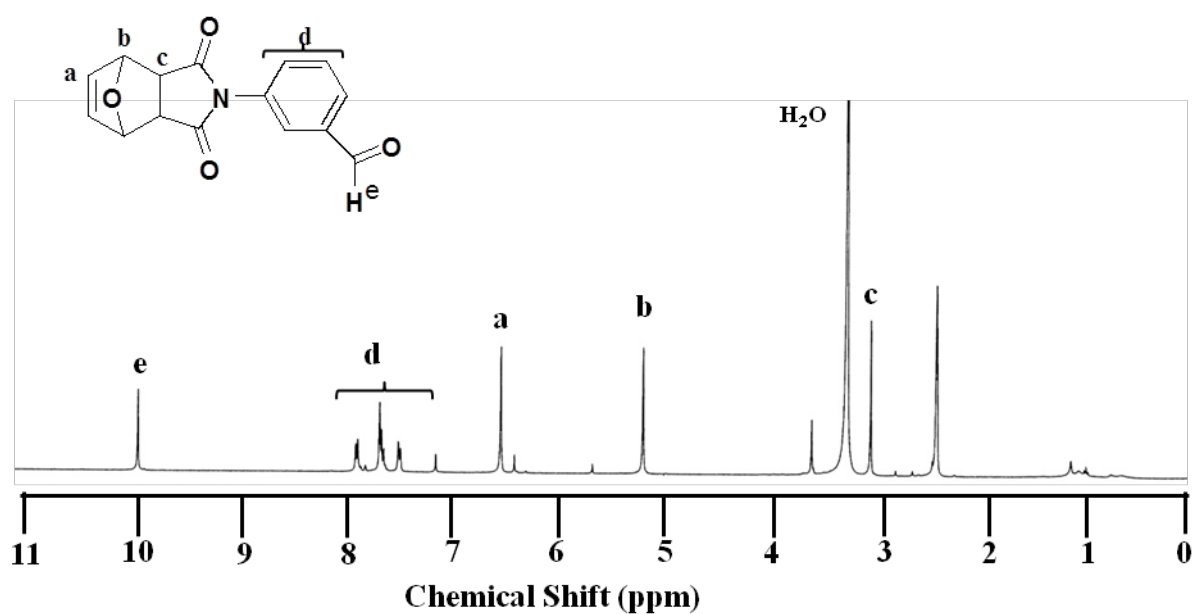

**Fig. S5:**  $^1\text{H}$  NMR spectrum of compound 5 in  $\text{DMSO-d}_6$

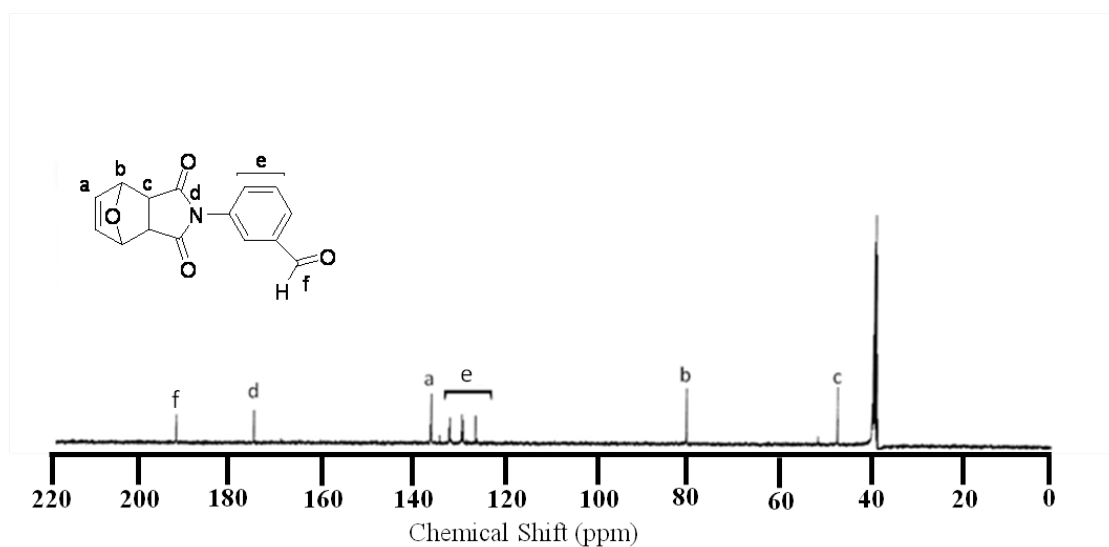

**Fig. S6:**  $^{13}\text{C}$  NMR spectrum of compound **5** in  $\text{DMSO-d}_6$ .

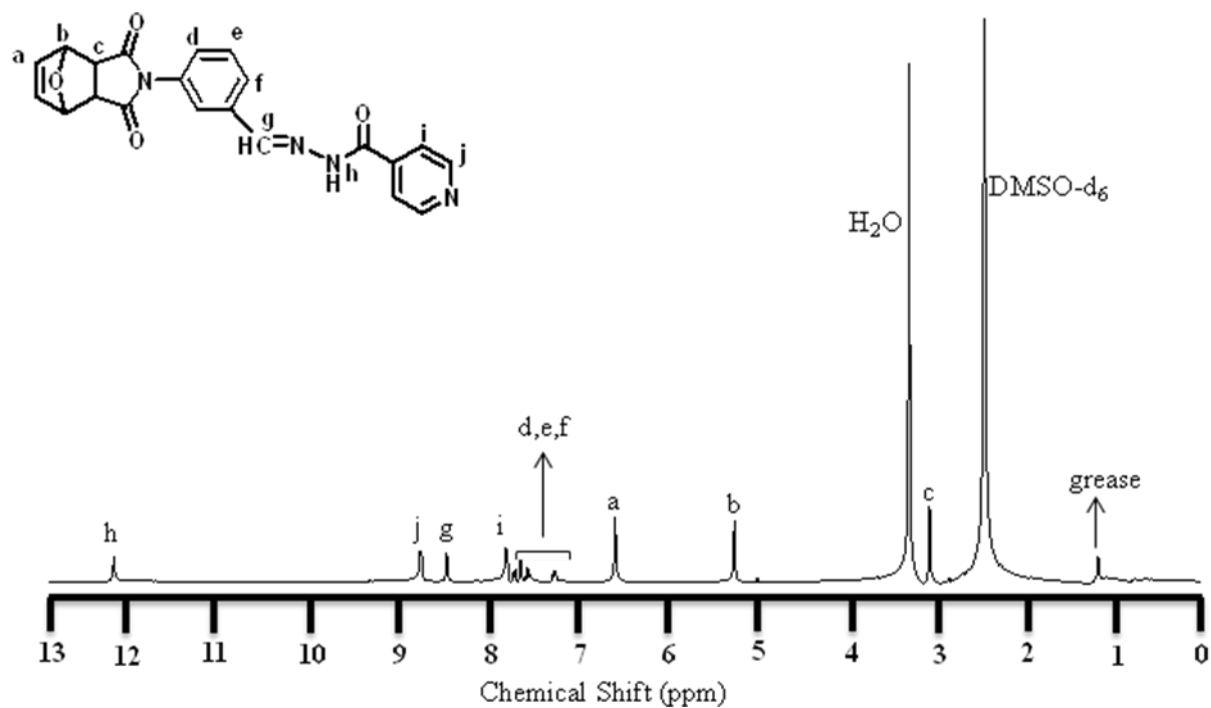

**Fig. S7:**  $^1\text{H}$  NMR spectrum of **Mono 3** in  $\text{DMSO-d}_6$ .



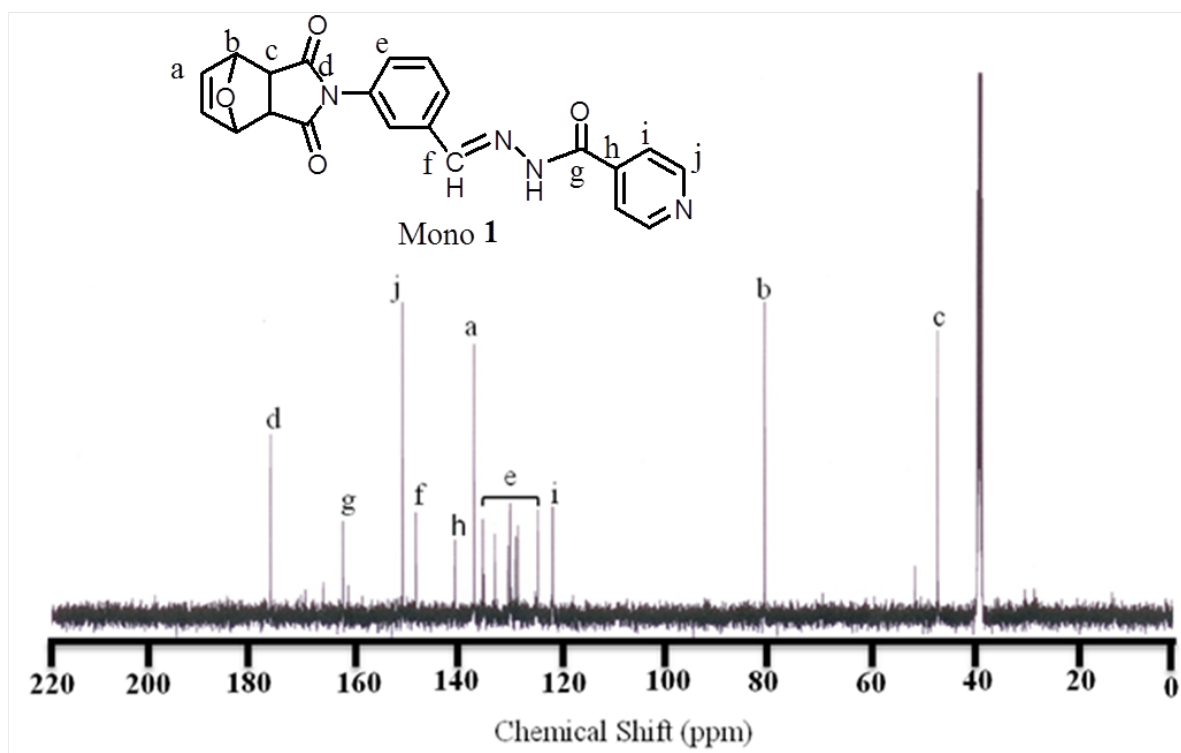

**Fig. S8:**  $^{13}\text{C}$  NMR spectrum of **Mono 3** in  $\text{DMSO-d}_6$ .

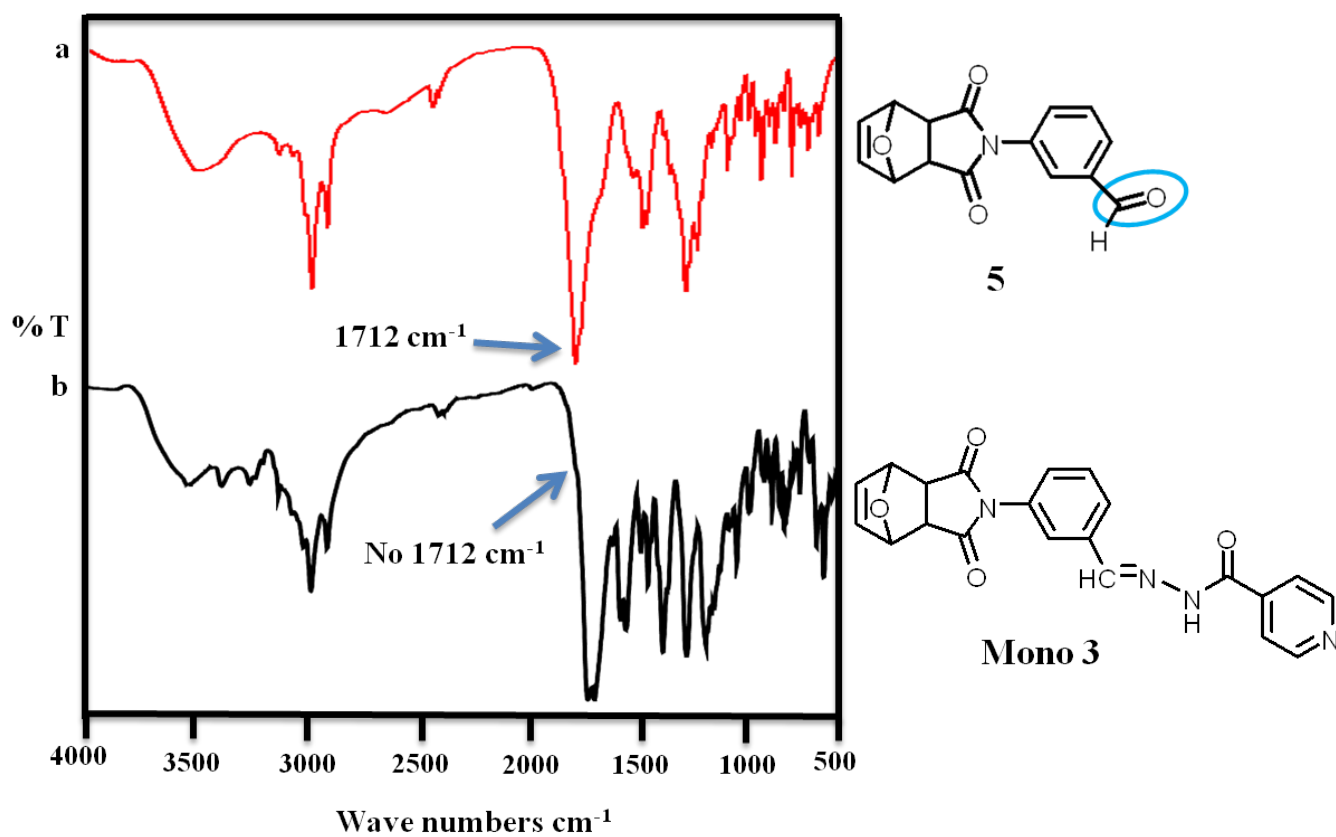

**Fig. S9:** FT-IR spectrum of (a) compound **5** and (b) **Mono 3**.

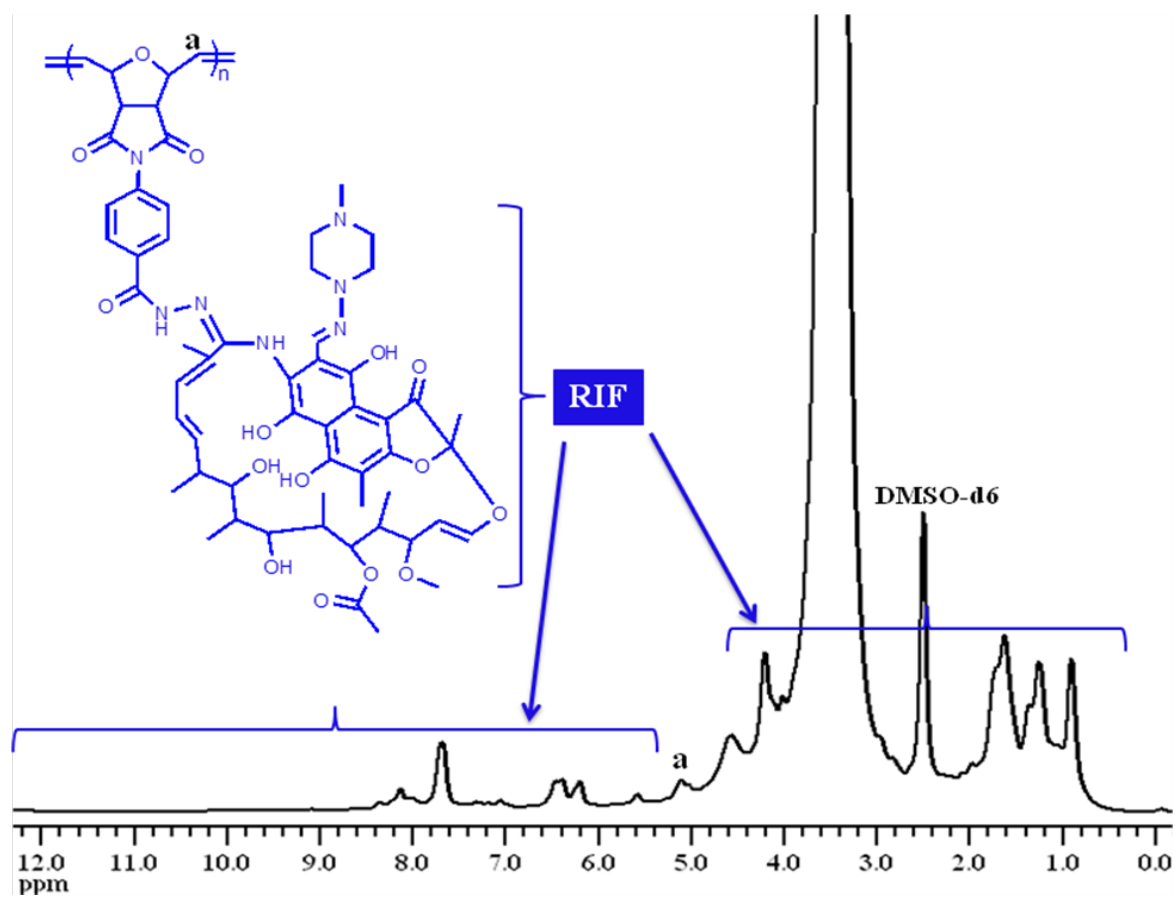

Fig. S10:  $^1\text{H}$  NMR spectrum of RIF-HP 4.

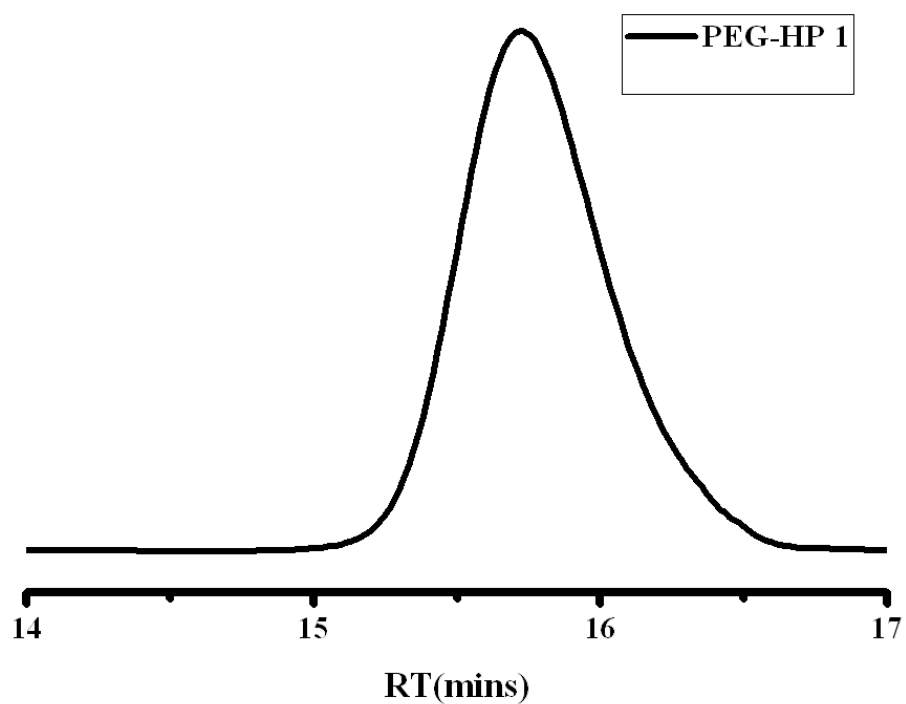

Fig. S11: GPC traces for PEG-HP 1 ( $M_n = 11400$ , PDI 1.07).

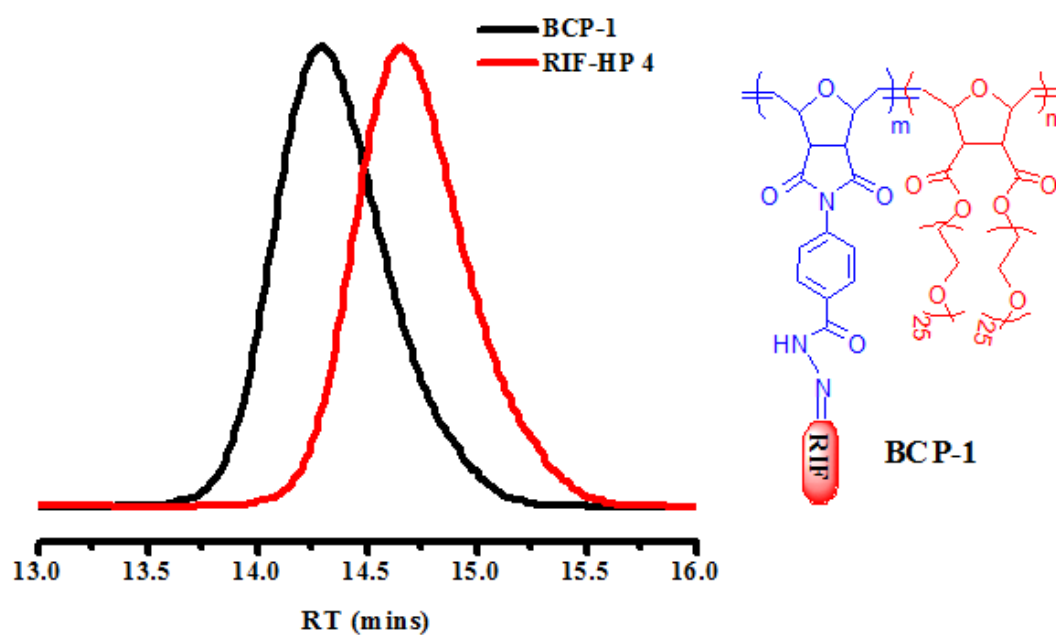

**Fig. S12:** A representative GPC traces for **BCP-1**( $M_n = 42000$ , PDI 1.10) (black) and **RIF-HP 4** ( $M_n = 32200$ , PDI 1.09) (red).

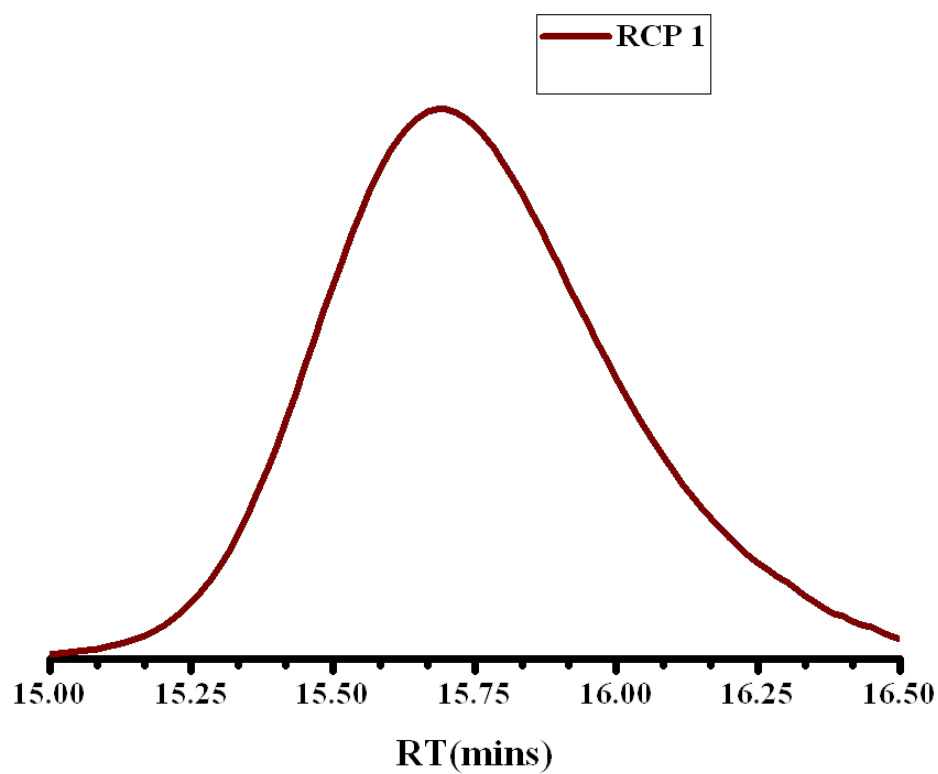

**Fig. S13:** GPC traces for **RCP- 1** ( $M_n = 11700$ , PDI 1.09).

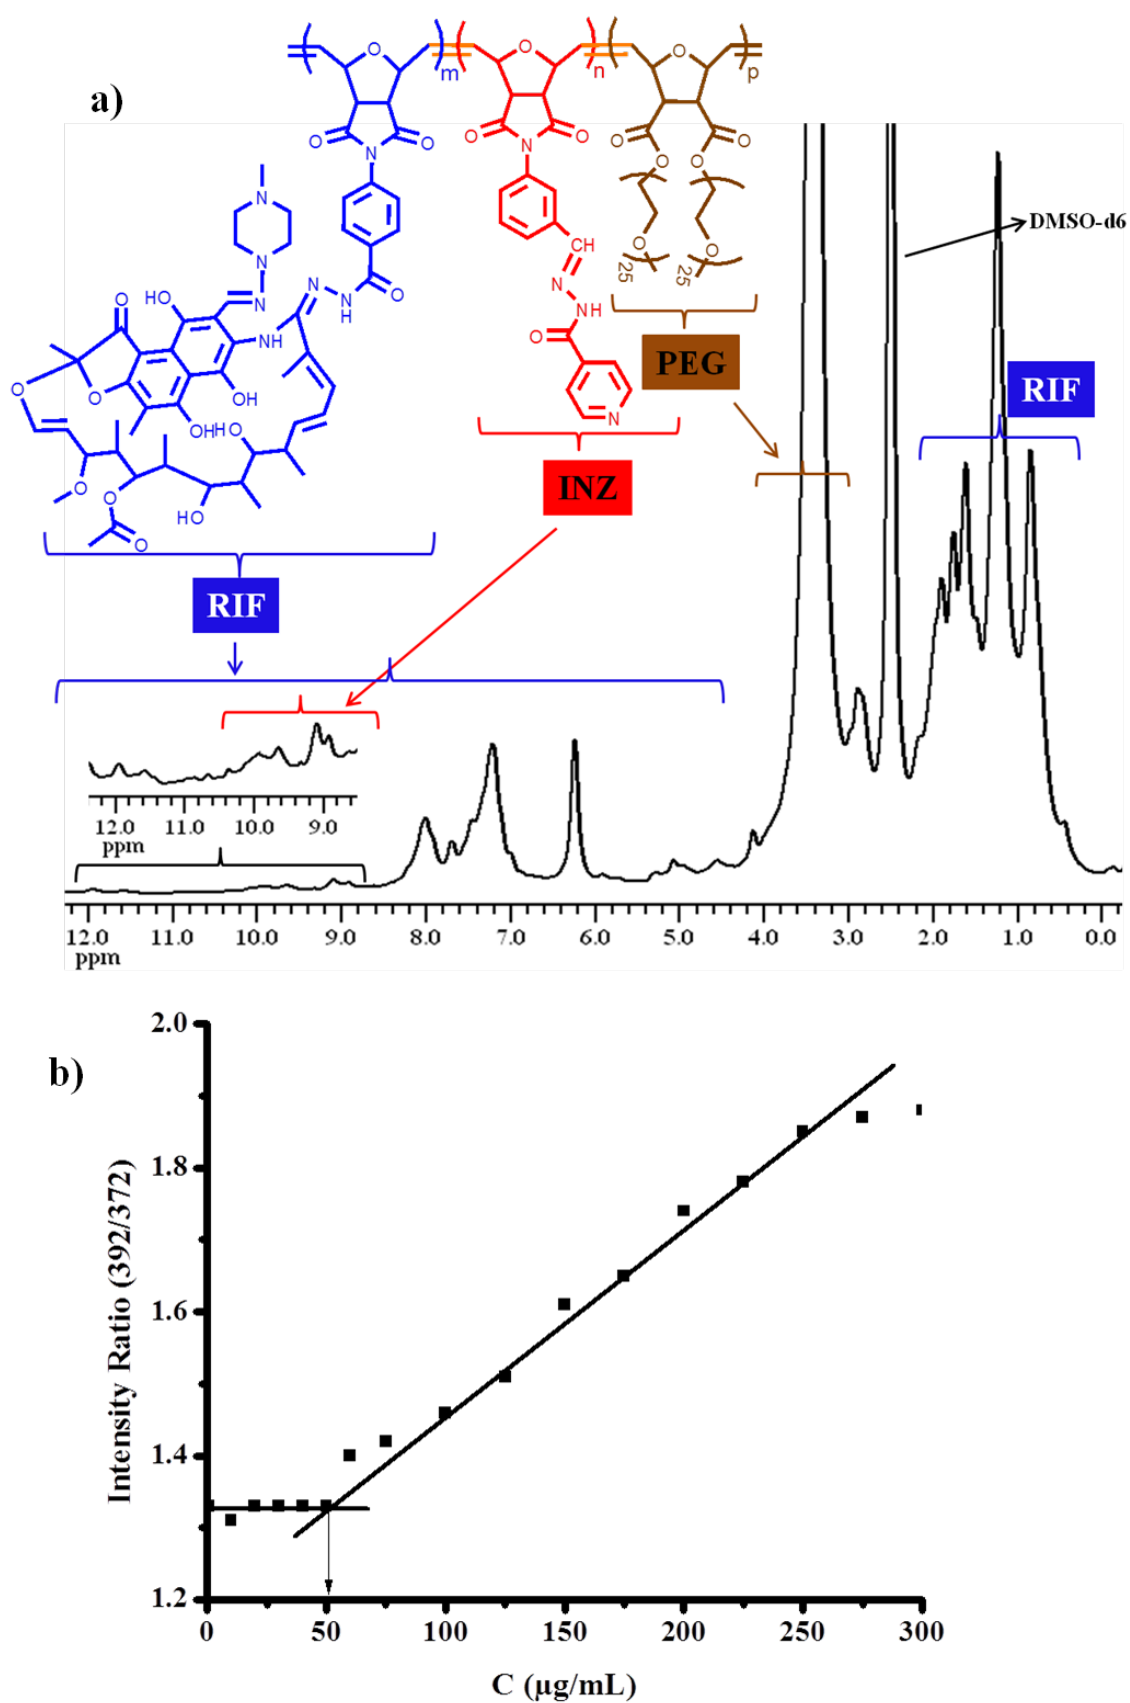

**Fig. S14:** (a)  $^1\text{H}$  NMR spectra for **RCP-2** in  $\text{DMSO-d}_6$ . (b) CAC study of **RCP-2** in water using pyrene as the probe, the observed CAC is  $50 \mu\text{g mL}^{-1}$ ,

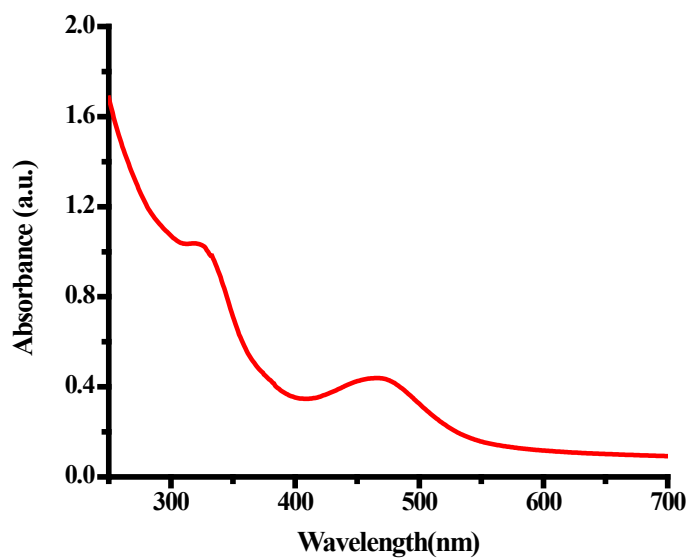

**Fig. S15:** UV spectra of RCP- 2.

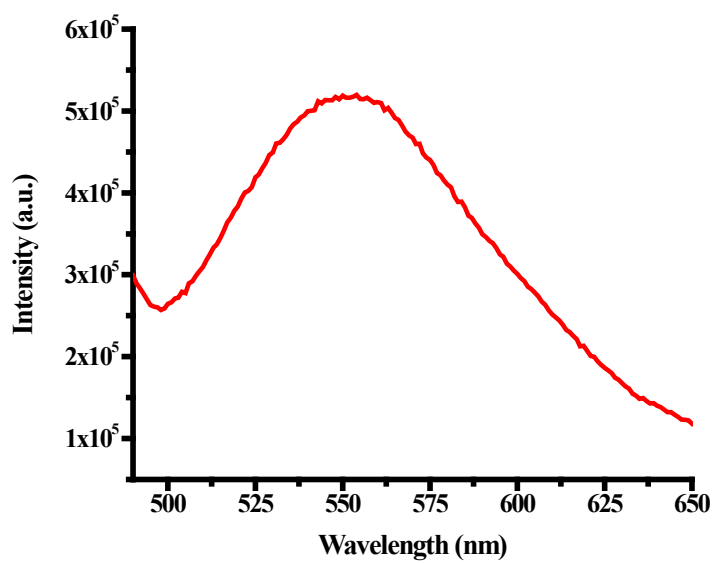

**Fig. S16:** Fluorescence spectra of RCP -2 excited at 469 nm.

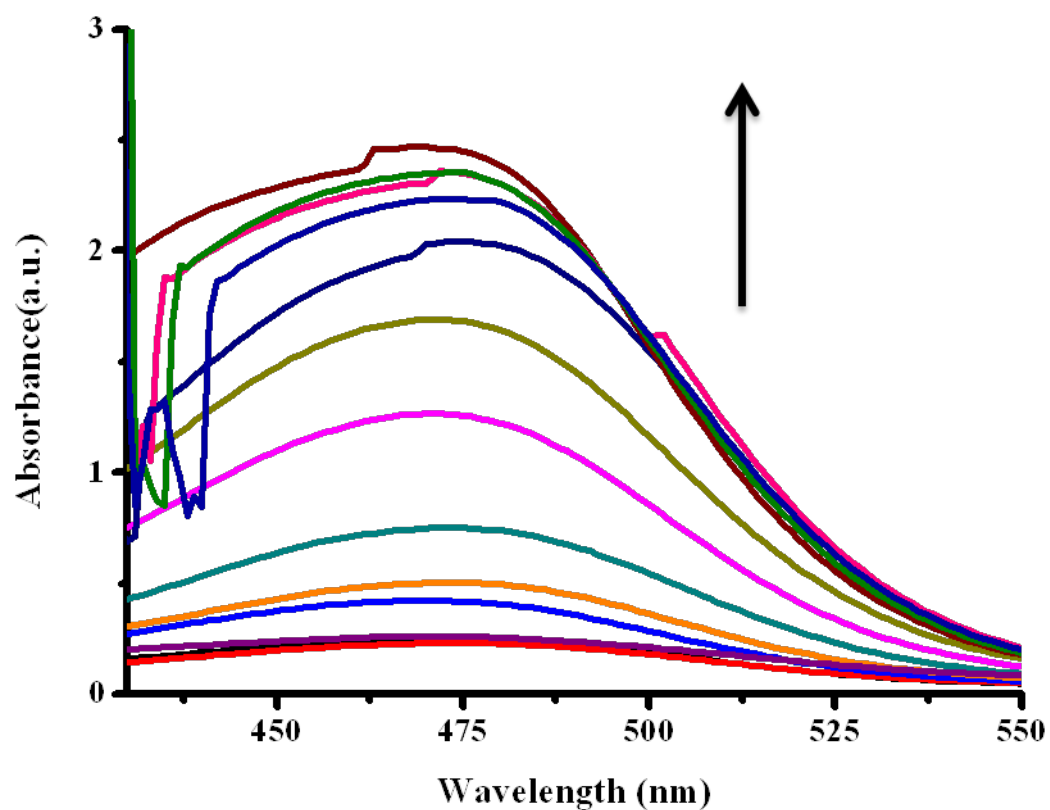

Fig. S17: UV spectra for drug release from RCP-2 at pH 5.5 by Dialysis method .

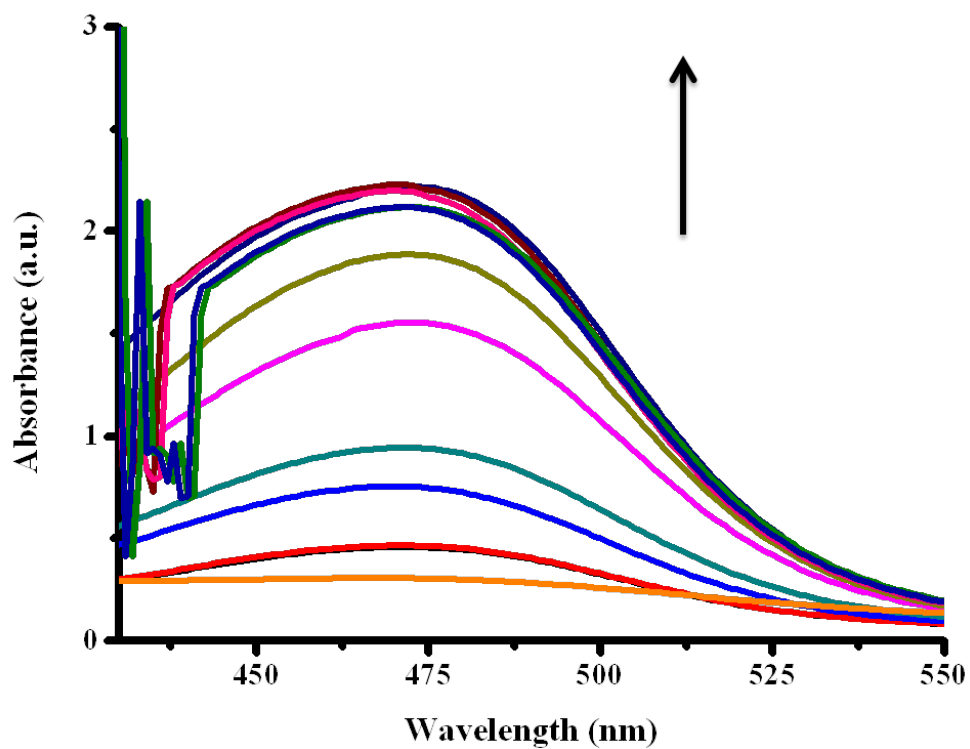

Fig. S18: UV spectra for drug release from RCP-2 at pH 6.5 by Dialysis method .

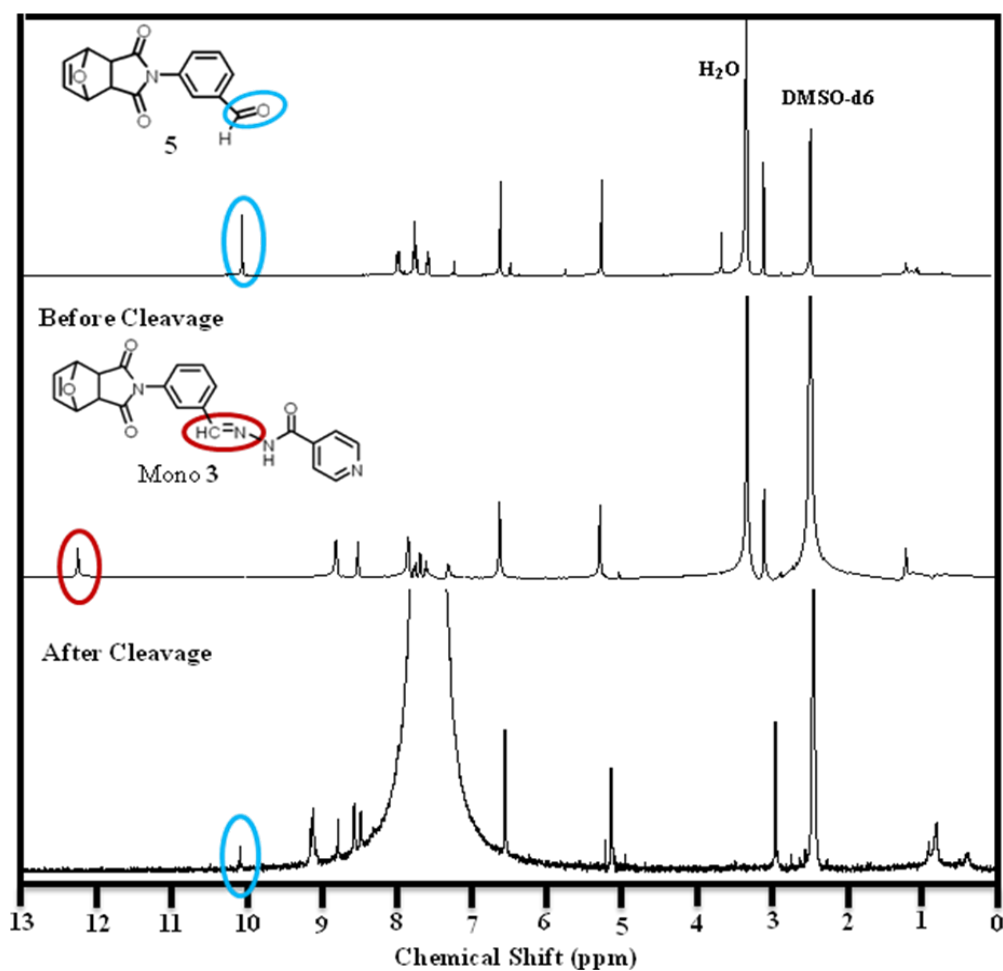

**Fig. S19:** A comparative <sup>1</sup>H NMR spectroscopy of compound **5**, **Mono 3** and **Mono 1** after exposure to the acidic condition in DMSO-d<sub>6</sub>.

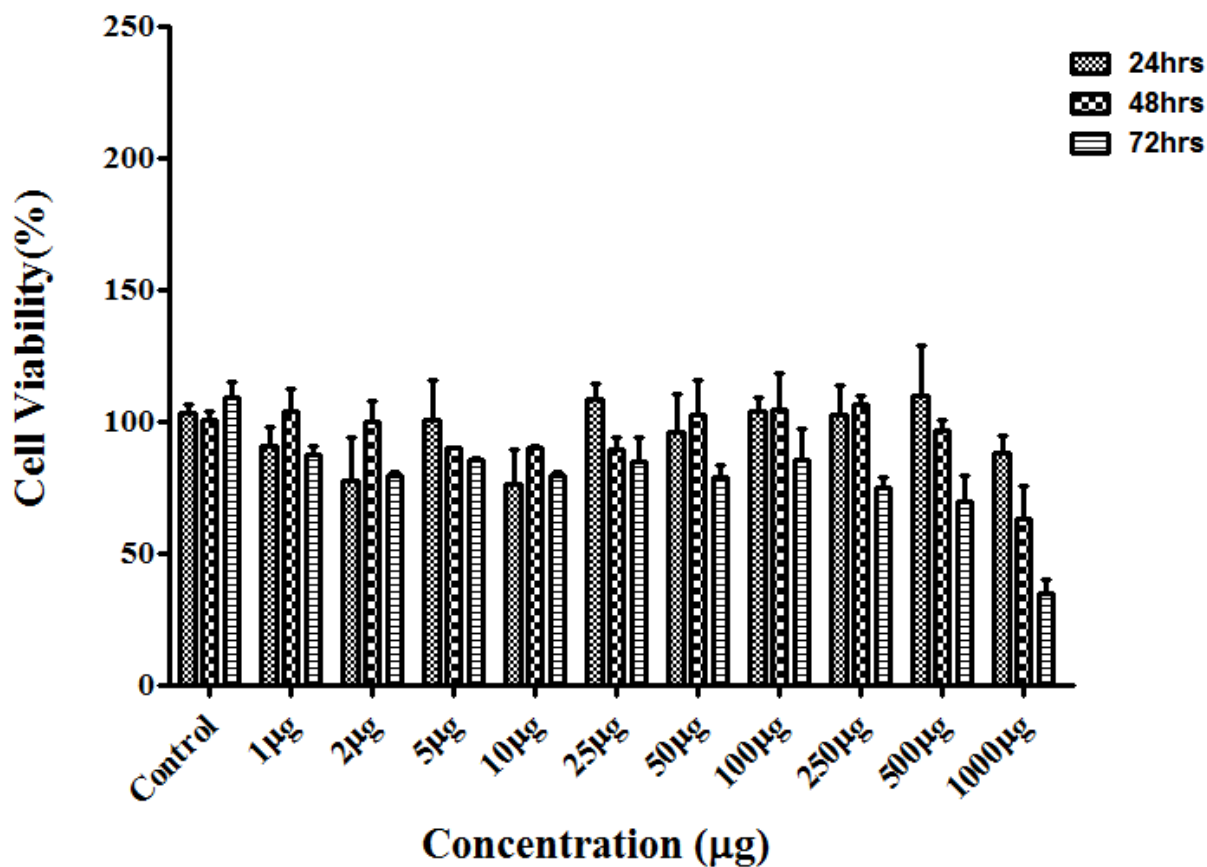

Fig. S20 : Cytotoxicity assay of Isoniazid.

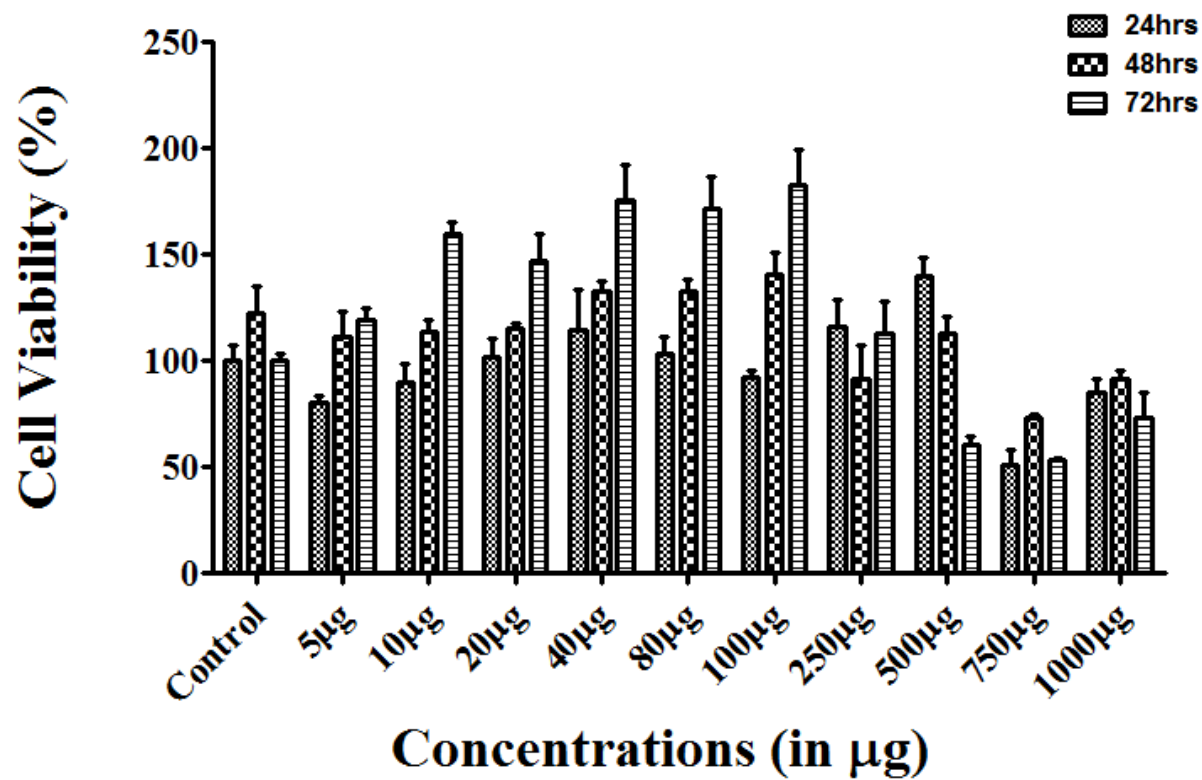

Fig. S21 : Cytotoxicity assay of Rifampicin on A549 cell line.



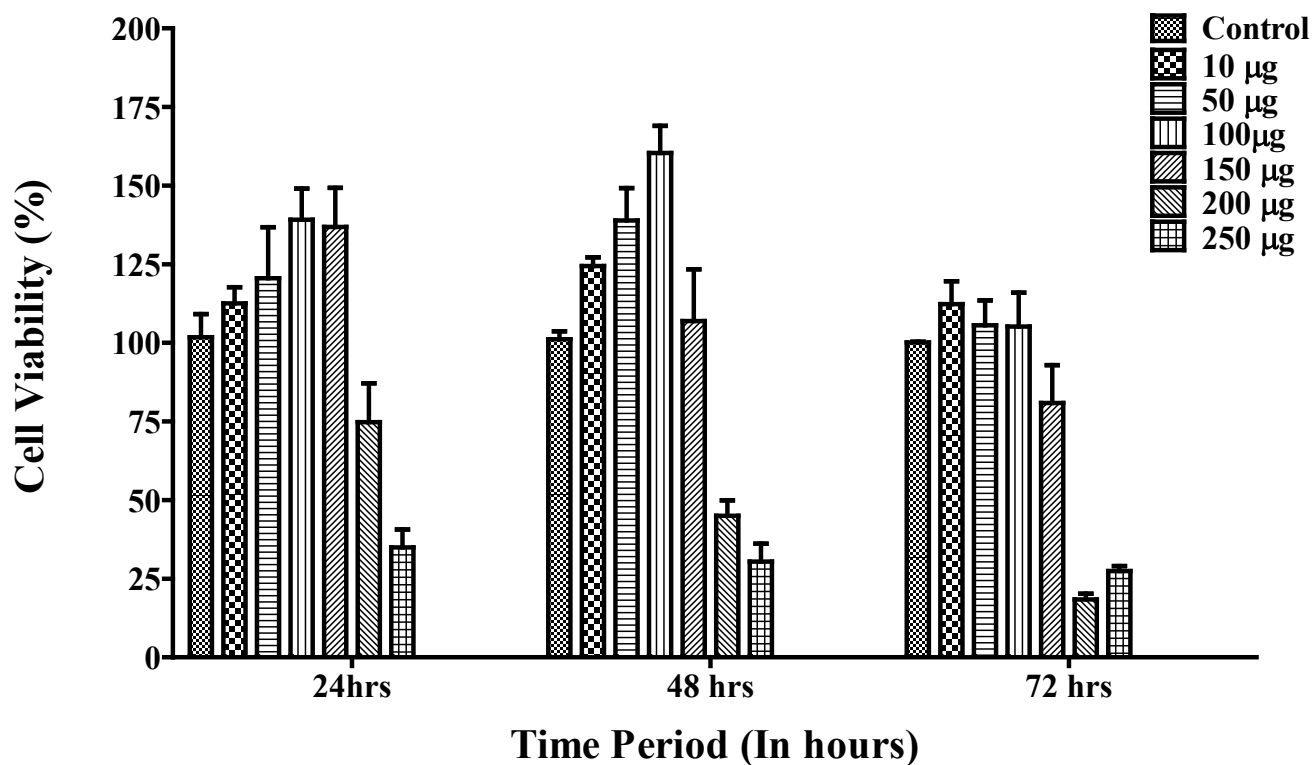

Fig. S22 : Cytotoxicity assay of Norbornene polymer alone tested in HEK 293 cell line.

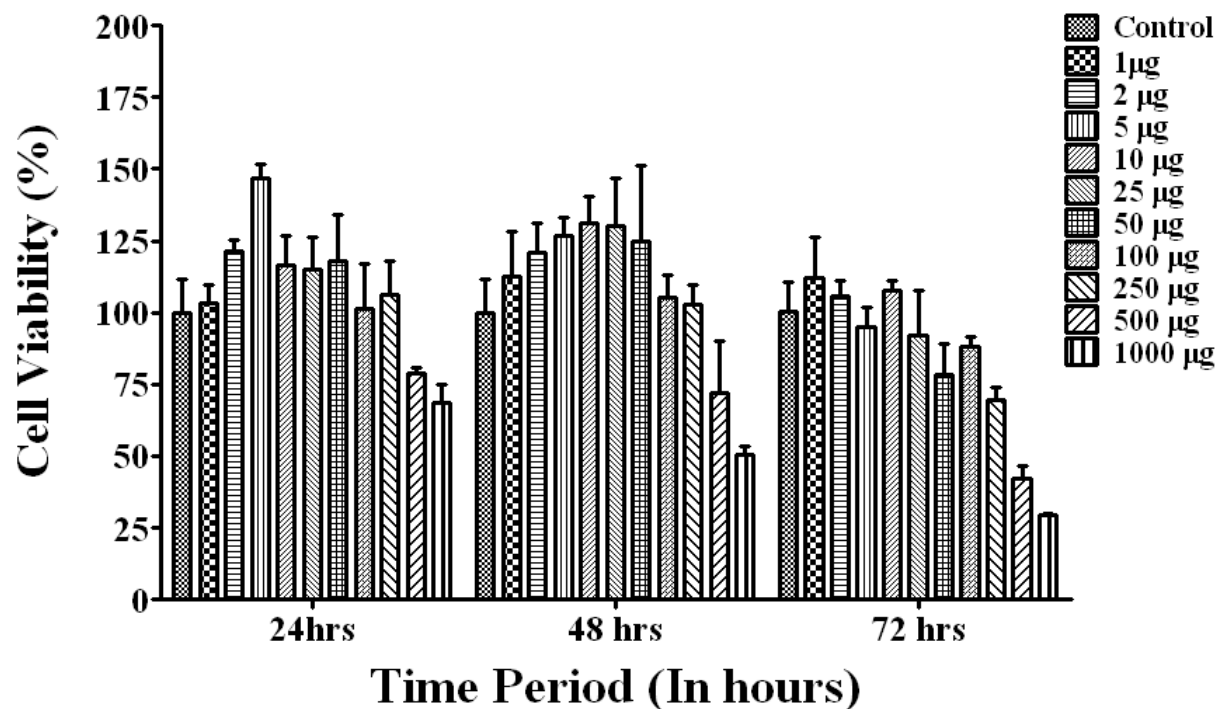

Fig. S23 : Cytotoxicity assay of the nanocarrier tested in normal healthy cells( HEK 293 cell line).

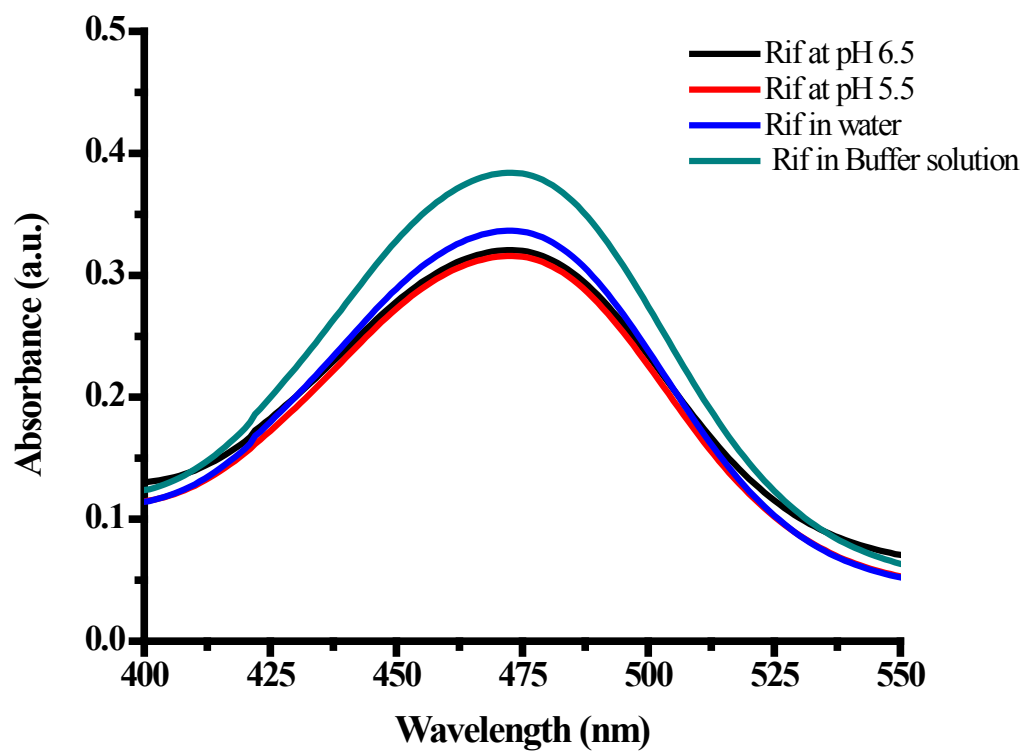

Fig. S24 : UV spectra of Rifampicin in different solutions.

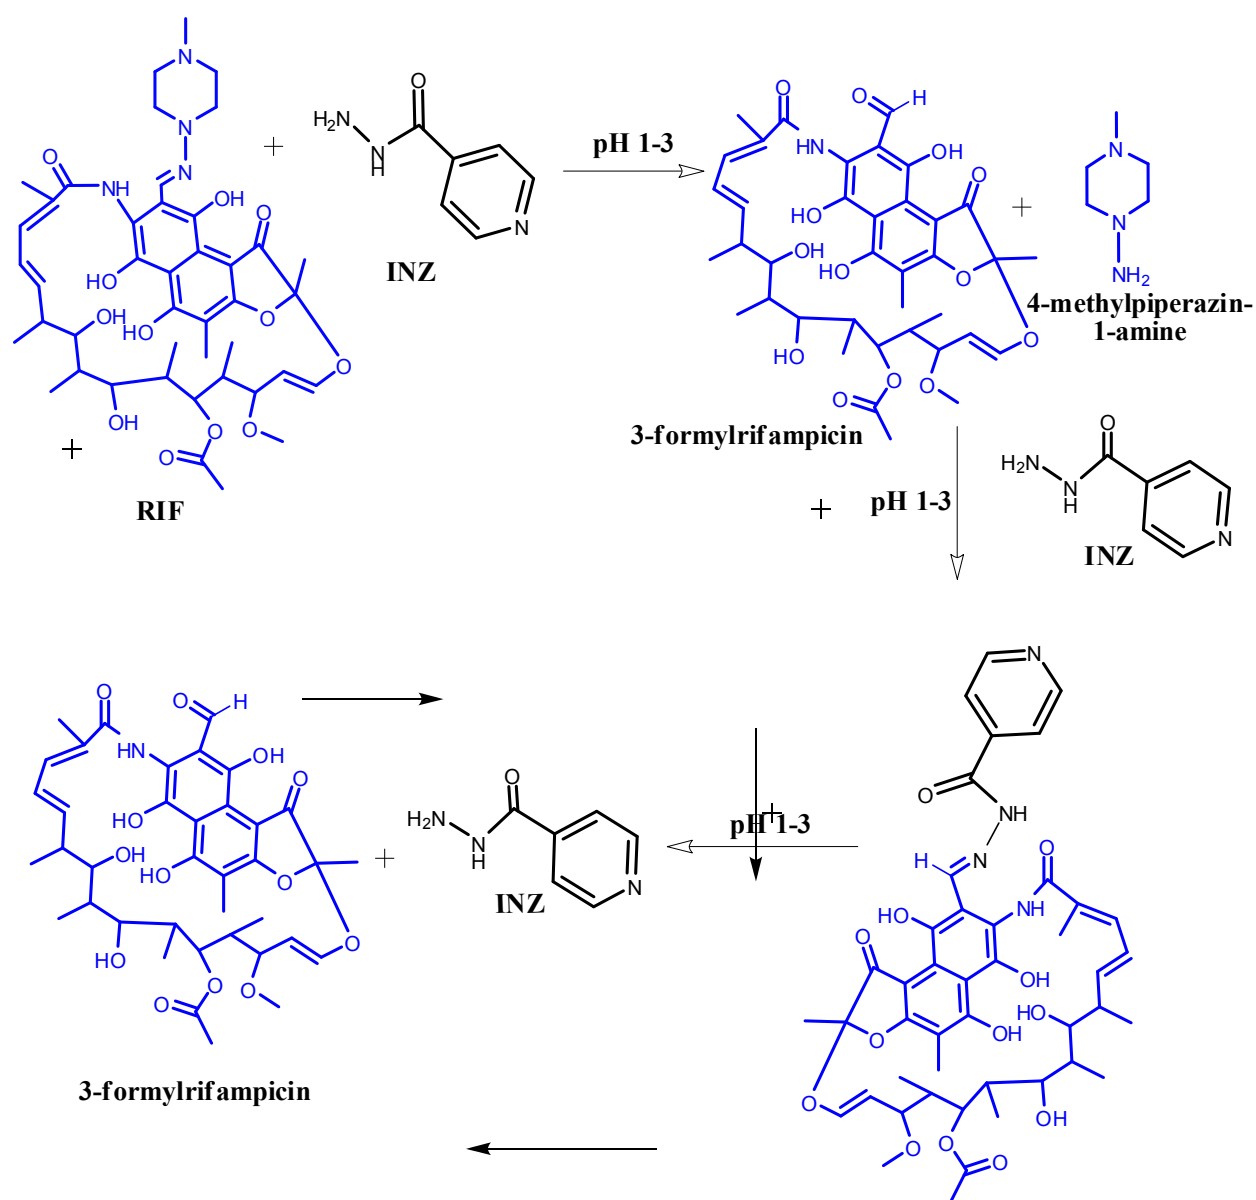

**Fig. S25** : Decomposition scheme for RIF. **Ref:** Singh, S., Mariappan, T. T., Sharda, N., Kumar, S., Chakraborti, A. K. *Pharm. Pharmacol. Commun.* **2000**, *6*, 405-410.

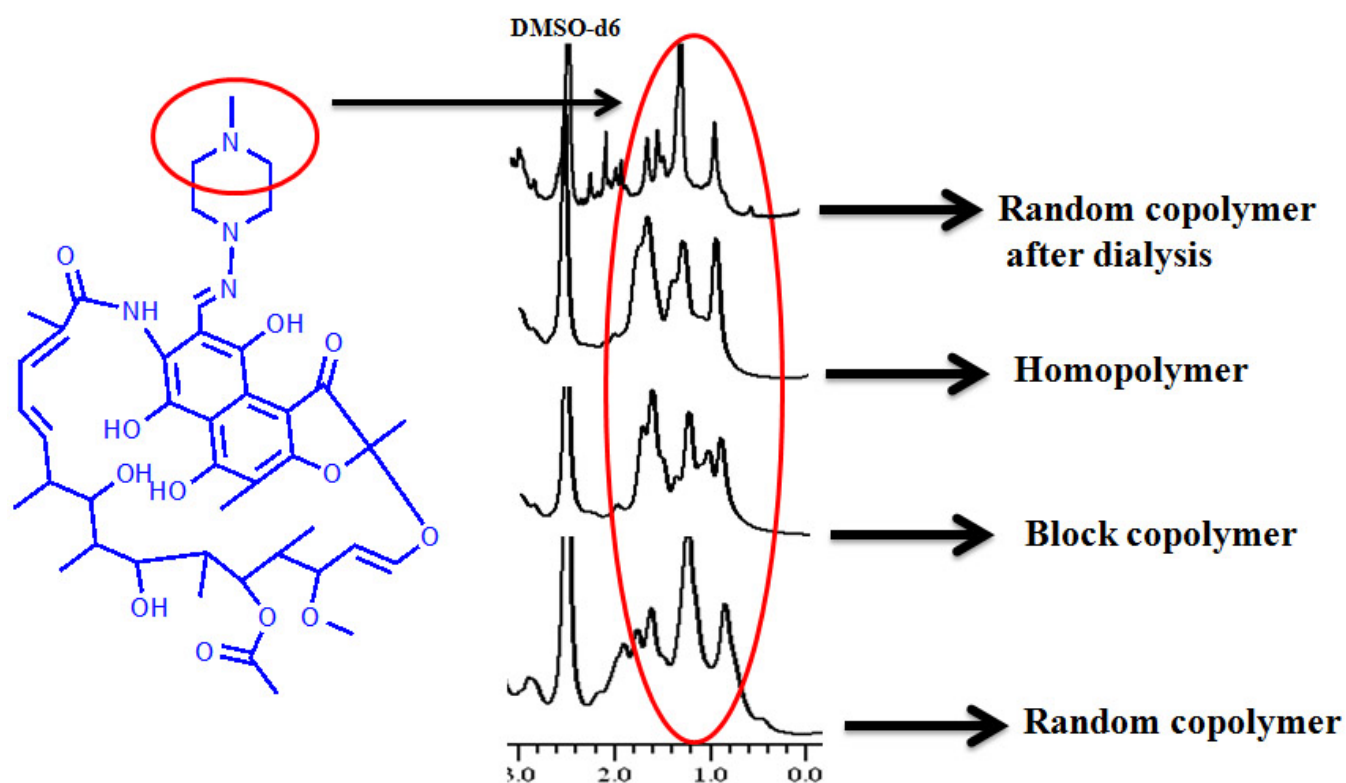

Fig. S26 : Control experiment to prove the delivery of undecomposed RIF drug.

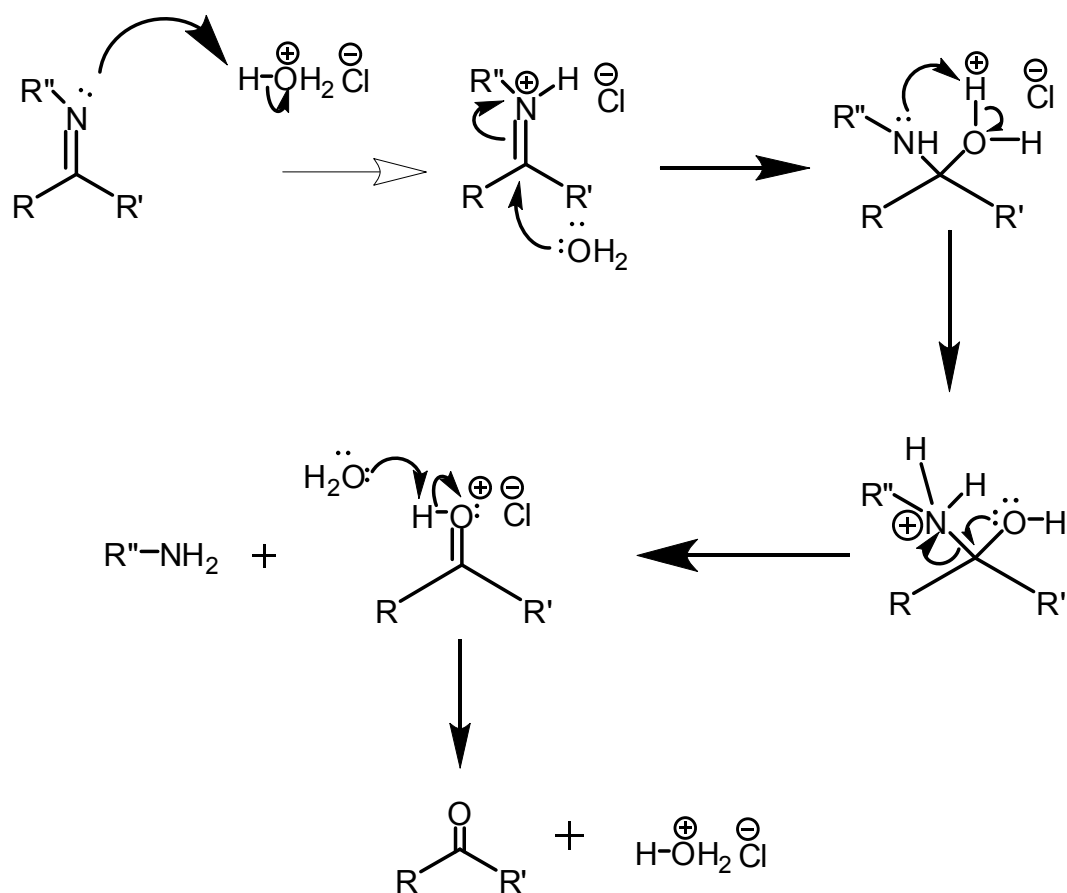

Fig. S27 : General mechanism for imine hydrolysis in acidic condition.
